# Supplementary material for: Sitagliptin, a dipeptidyl peptidase-4 inhibitor, in patients with short bowel syndrome and colon in continuity: an open-label pilot study
Source: PubMed Central journal article supplement — BMJ Open Gastroenterol. 2021 May 11;8(1):e000604. doi: 10.1136/bmjgast-2021-000604 (PMC8117993; doi:10.1136/bmjgast-2021-000604), 2021-05-11
Supplement: bmjgast-2021-000604supp001.pdf [file bmjgast-2021-000604supp001.pdf]

**Sitagliptin, a dipeptidyl peptidase-4 inhibitor, in patients with short bowel syndrome and colon in continuity: an open-label pilot study**

**Supplementary material**

### Details on hormone analyses

All samples were extracted in a final concentration of 70% (GLP-1, PYY, GIP and glucagon) or 75% (GLP-2) ethanol before measurements. Total GLP-1 immunoreactivity was measured as described previously[1] using a radioimmunoassay (antibody code no. 89390) specific for the C-terminal part of the GLP-1 molecule and reacting equally with intact GLP-1 and the primary (N-terminally truncated) metabolite. Intact GLP-2 was measured using an in-house developed radioimmunoassay as originally described.[2] The antiserum (code no. 92160) is directed against the N-terminus of GLP-2 and therefore measures only fully processed intestinal GLP-2. Total PYY was measured as previously described[3] using a monoclonal antibody MAB8500 (Abnova, clone RPY-B12), which reacts equally well with PYY<sub>1-36</sub> and PYY<sub>3-36</sub>. Synthetic human PYY<sub>3-36</sub> (Bachem, cat no. H-8585) was used as standard and <sup>125</sup>I-labeled PYY (Perkin Elmer, cat no. Nex341) as tracer. Total GIP concentration was measured with a radioimmunoassay using an antibody directed towards the C-terminal (code no. 80867), which reacts fully with intact GIP and N-terminally truncated forms.[4] For glucagon measurements we used a C-terminally directed antiserum (code no. 4305), therefore measuring glucagon of pancreatic origin.[5] Sensitivity for all assays was below 1 pmol/L, and intra assay coefficient of variation below 10 %.

**Supplementary table 1:** Body weight and body composition.

|                               | Baseline             | Treatment            | Effect                 | P-value |
|-------------------------------|----------------------|----------------------|------------------------|---------|
| <b>Lean body mass (kg)</b>    | 45.1 (28.3, 56.4)    | 46.6 (29.6, 55.2)    | 0.3 (-1.2, 1.5)        | 0.091   |
| <b>Fat mass (kg)</b>          | 20.4 (15.1, 44.1)    | 19.1 (16.6, 44.3)    | -0.7 (-2.2, 1.5)       | 0.310   |
| <b>BMD (g/cm<sup>2</sup>)</b> | 1.006 (0.628, 1.157) | 1.022 (0.610, 1.168) | -0.014 (-0.033, 0.016) | 0.310   |
| <b>Body weight (kg)</b>       | 74.0 (52.3, 88.0)    | 74.3 (52.2, 90.0)    | 0.3 (-0.2, 2.0)        | 0.116   |

Data is presented as median (min, max). BMD = bone mineral density.

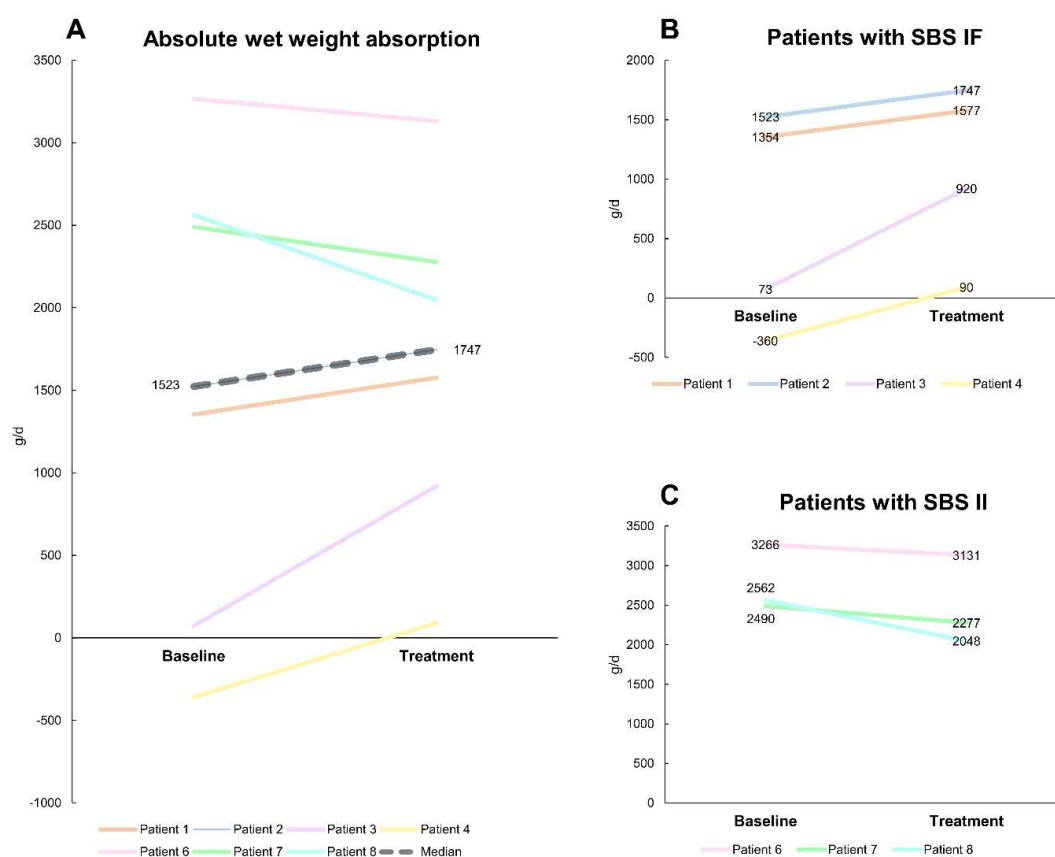

**Supplementary figure 1:** Changes from baseline to treatment in absolute wet weight absorption. A: all patients with SBS (n=7). B: patients with SBS-IF (n=4). C: patients with SBS-II (n=3).

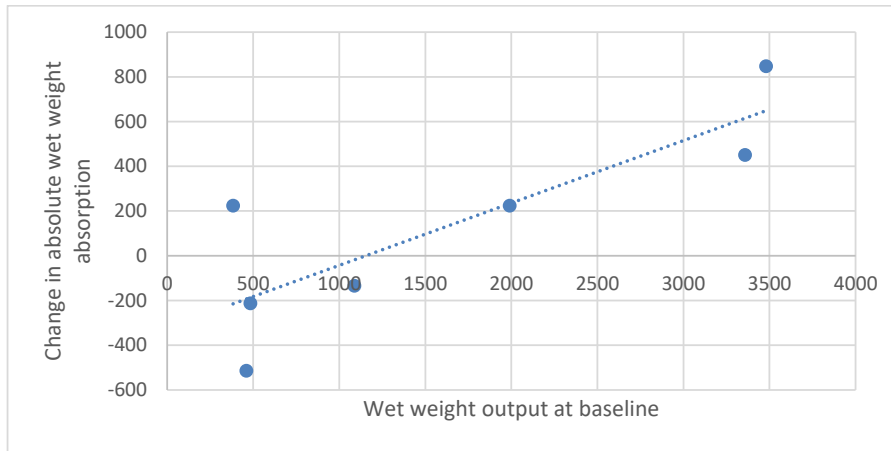

**Supplementary figure 2:** Spearman correlation between faecal wet weight output at baseline and change in absolute wet weight absorption following treatment with sitagliptin.

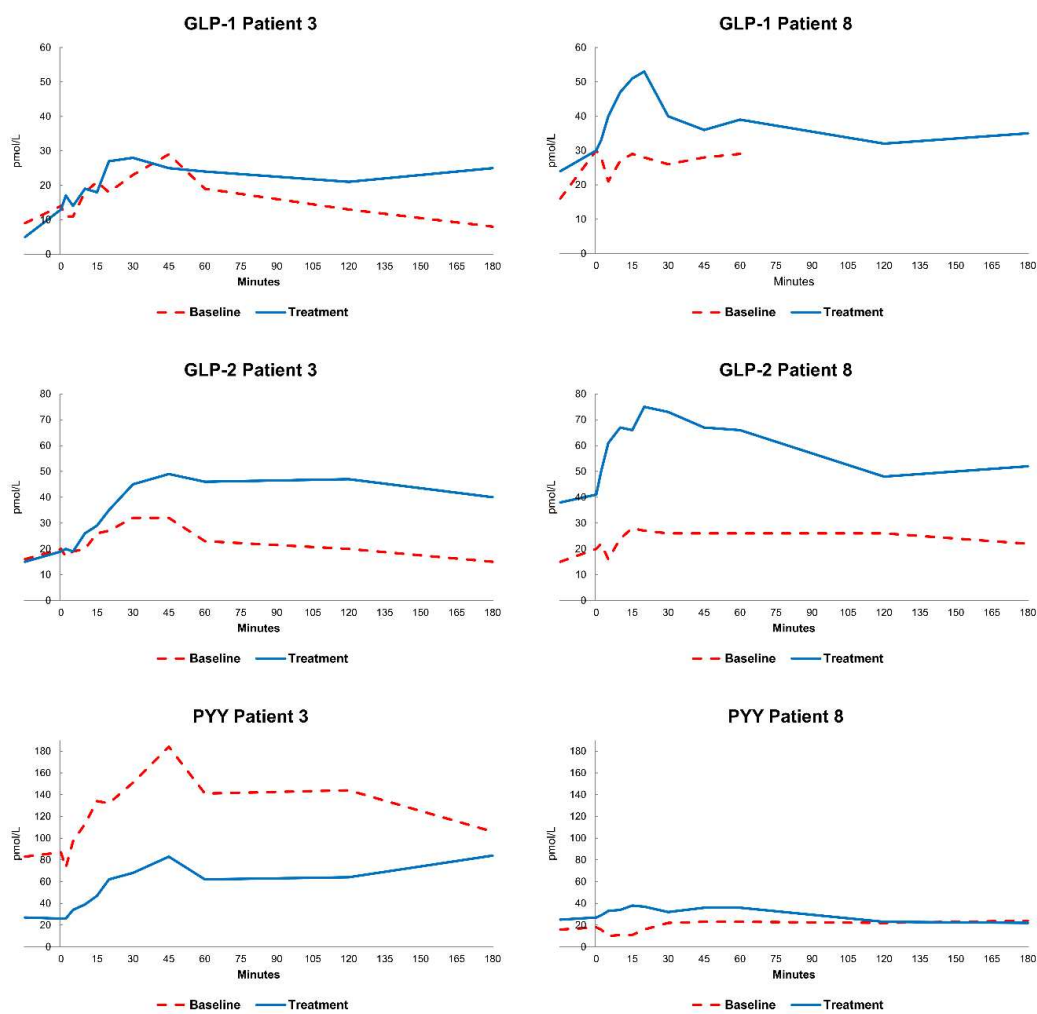

**Supplementary figure 3:** Postprandial hormone profiles at baseline and after treatment for patient 3 and patient 8. GLP = glucagon-like peptide; PYY = peptide YY

## GLP-1 Individual results

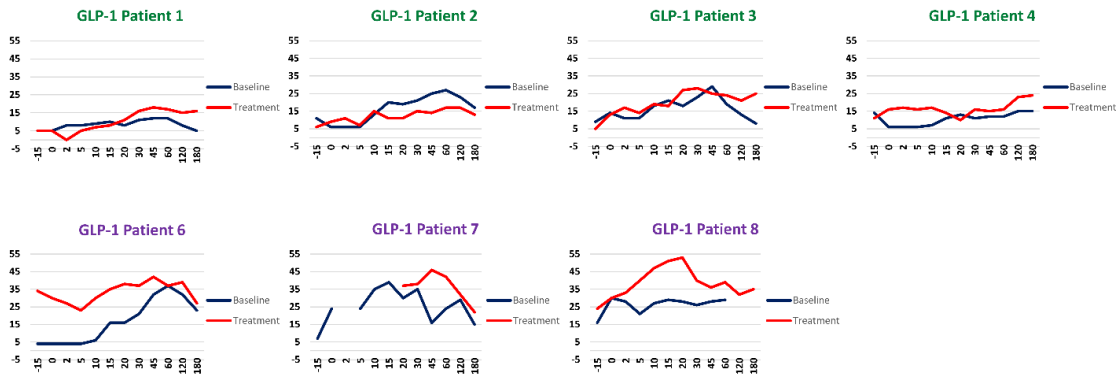

**Supplementary figure 4:** Individual postprandial hormone profiles at baseline and after treatment with sitagliptin. GLP = glucagon-like peptide

## GLP-2 Individual results

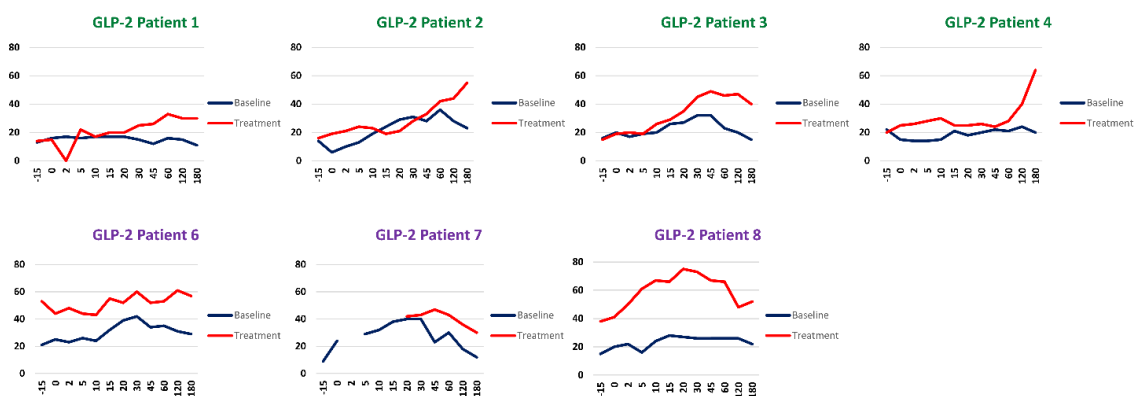

**Supplementary figure 5:** Individual postprandial hormone profiles at baseline and after treatment with sitagliptin. GLP = glucagon-like peptide

## PYY Individual results

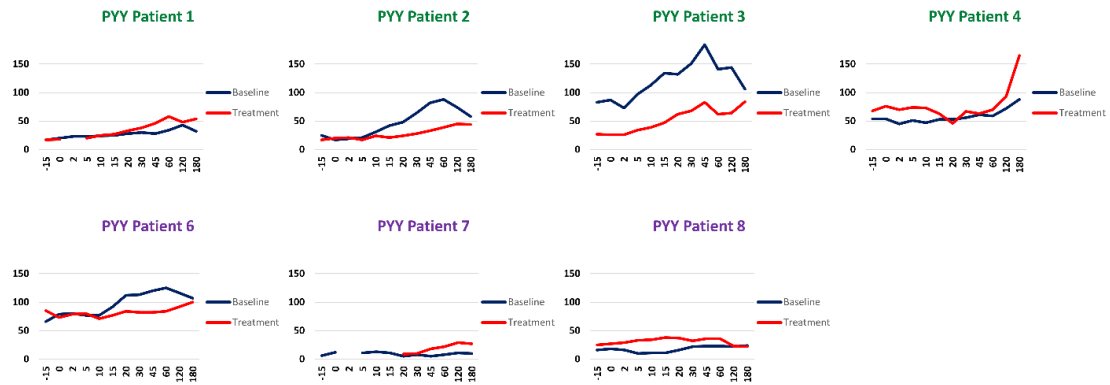

**Supplementary figure 6:** Individual postprandial hormone profiles at baseline and after treatment with sitagliptin. PYY = peptide YY

## GIP, Individual results

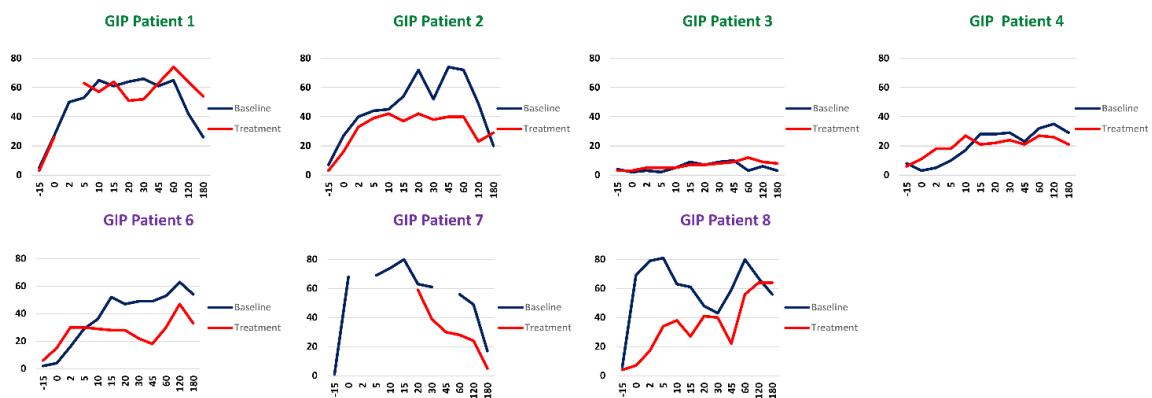

**Supplementary figure 7:** Individual postprandial hormone profiles at baseline and after treatment with sitagliptin. GIP = glucose-dependent insulinotropic peptide

## Glucagon Individual results

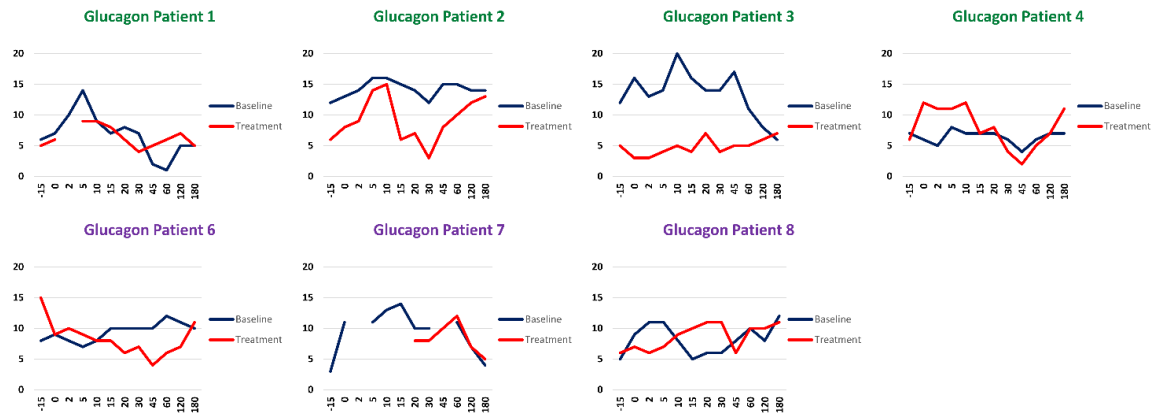

**Supplementary figure 8:** Individual postprandial hormone profiles at baseline and after treatment with sitagliptin.



## References

1. Orskov C, Rabenhøj L, Wettergren A, et al. Tissue and plasma concentrations of amidated and glycine-extended glucagon-like peptide i in humans. *Diabetes*. 1994;43(4):535–9.
2. Hartmann B, Johnsen AH, Ørskov C, et al. Structure, measurement, and secretion of human glucagon-like peptide-2. *Peptides*. 2000;21(1):73–80.
3. Toräng S, Bojsen-Møller KN, Svane MS, et al. In vivo and in vitro degradation of peptide YY 3-36 to inactive peptide YY 3-34 in humans . *Am J Physiol Regul Integr Comp Physiol*. 2016;310(9):R866–74.
4. Lindgren O, Carr RD, Deacon CF, et al. Incretin hormone and insulin responses to oral versus intravenous lipid administration in humans. *J Clin Endocrinol Metab*. 2011;96(8):2519–24.
5. Orskov C, Jeppesen J, Madsbad S, et al. Proglucagon products in plasma of noninsulin-dependent diabetics and nondiabetic controls in the fasting state and after oral glucose and intravenous arginine. *J Clin Invest*. 1991;87(2):415–23.
